# Supplementary material for: Inter-ligand charge-transfer interactions in a photochromic and redox active zinc–organic framework
Source: Royal Society of Chemistry journal article supplement (doi:10.1039/d1ce00689d), 2021-01-01
Supplement: d1ce00689d1.pdf [file d1ce00689d1.pdf]

## Inter-ligands charge-transfer interactions in a photochromic and redox active zinc-organic framework

Yan Zhou,<sup>a, b, \*</sup> Lei Han,<sup>a</sup> and Wen-Jie Chen<sup>c</sup>

<sup>a</sup> Faculty of Materials Science & Chemical Engineering, Ningbo University, Ningbo, Zhejiang 315211, P. R. China

<sup>b</sup> School of Chemistry and Chemical Engineering, Guangxi University for Nationalities, 188 Daxue East Road, Nanning, Guangxi 530006, P. R. China

<sup>c</sup> Department of Material Chemistry, College of Chemical Engineering and Material, Quanzhou Normal University, Quanzhou, Fujian 362000, P. R. China

Corresponding e-mail: [zhouyan8212@hotmail.com](mailto:zhouyan8212@hotmail.com).

### Experimental

#### General information

H<sub>2</sub>NDI-ATZ (2,7-di(1H-tetrazol-5-yl)benzo[Imn][3,8]phenanthroline-1,3,6,8(2H,7H)-tetraone) was synthesized according to the procedure of literature.<sup>13</sup> Zn(NO<sub>3</sub>)<sub>2</sub>·6H<sub>2</sub>O and terephthalic acid were received and used without further purification. FT-IR spectra were recorded on a Shimadzu FTIR-8900 spectrometer using KBr pellets in the range of 400–4000 cm<sup>-1</sup>. Elemental analyses were carried out on an Elementar Vario EL III analyser. Powder X-ray diffraction (PXRD) measurements were carried out on a Bruker D8 ADVANCE X-ray powder diffractometer using Cu K $\alpha$  ( $\lambda = 1.5418 \text{ \AA}$ ) at 40 KV and 40 mA. Thermogravimetric measurements were performed from room temperature to 800 °C at a heating rate of 10 °C/min under air atmosphere using a SII TG/DTA7300 apparatus. UV-visible (UV-vis) spectra were recorded at room temperature on a PerkinElmer Lambda 900 UV/vis/NIR spectrophotometer equipped with an integrating sphere in the wavelength range of 200-1200 nm. BaSO<sub>4</sub> plates were used as reference (100% reflection), on which the finely ground powder of the sample was coated. ESR spectra were measured on a Bruker ER-420 spectrometer with a 100 kHz magnetic field in X

band at room temperature. Fluorescence spectra were recorded with an FL-F4600 spectrometer.

### Synthesis of $\{[\text{Zn}_4(\text{NDI-ATZ})_2(\text{BDC})_2(\text{DMF})_6] \cdot (\text{DMF})\}_n$ (NBU-4)

A mixture of  $\text{Zn}(\text{NO}_3)_2 \cdot 6\text{H}_2\text{O}$  (0.0300 g, 0.1 mmol),  $\text{H}_2\text{NDI-ATZ}$  (0.0201 g, 0.05 mmol), and terephthalic acid (0.0042 g, 0.025 mmol) were dissolved in 3 mL DMF. Then, the resulting clear solution was sealed in a Pyrex tube and heated at 80 °C for 24 h. Yellow rod crystals were obtained with 37% yield based on  $\text{Zn}(\text{NO}_3)_2 \cdot 6\text{H}_2\text{O}$ . Anal. Cal. for  $\text{C}_{69}\text{H}_{65}\text{N}_{27}\text{O}_{23}\text{Zn}_4$  (%): C 43.57, H 3.45, N 19.89; found (%): C 43.52, H 3.46, N 19.88. IR (KBr,  $\text{cm}^{-1}$ ): 3440 (s), 1700 (vs), 1502 (s), 1338 (vs), 1255 (s), 1108 (w), 989 (w), 840 (m), 748 (m).

### X-ray Crystallography

Single crystal data of **NBU-4** was collected on a Bruker Apex II CCD area-detector diffractometer using Mo-K $\alpha$  radiation ( $\lambda = 0.71073 \text{ \AA}$ ). The structure was solved with direct methods and refined with a full-matrix least-squares technique with the SHELXTL program package. Absorption correction was applied by using multi-scan program SADABS. All non-hydrogen atoms were refined anisotropically. Hydrogen atoms bonded to carbon atoms were placed at calculated positions and refined using a riding model approximation, with C–H = 0.93 (aromatic CH) and with  $U_{\text{iso}}(\text{H}) = 1.2U_{\text{eq}}(\text{C})$ . The  $\text{CH}_3$  hydrogen atoms of DMF molecules (C–H = 0.96 with  $U_{\text{iso}}(\text{H}) = 1.5U_{\text{eq}}(\text{C})$ ). Crystallographic data and refinement details are shown in Table S1, selected bond distances and bond angles are listed in Tables S2 (ESI $\dagger$ ). Crystallographic data have been deposited with the Cambridge Crystallographic Data Centre, CCDC no. 1846228.

### Electrochemical studies

The electrochemical measurements were carried out using a CHI 760E electrochemical analyser with three-electrode system. **NBU-4** was coated at FTO substrate and acted as a working electrode, AgCl/Ag and a platinum wire as auxiliary and counter electrodes, respectively. An amount (5 mg) of **NBU-4** or  $\text{H}_2\text{NDI-AZT}$  ligand was dispersed in 0.5% Nafion / ethanol solution for 10 min. 25  $\mu\text{L}$  of the above dispersion solution was dropped onto the pre-cleaned FTO electrode and dried under ambient conditions and used as the

working electrode. Electrochemical test was performed in 0.1M TBAP ( $[(n\text{-Bu})_4\text{N}]\text{PF}_6$ ) electrolyte.

### Computational Details

The B3LYP functional <sup>[S1]</sup> was employed in the density functional theory (DFT) calculations, which were carried out using the Gaussian 09 software package.<sup>[S2]</sup> The geometries model used for the optimization were taken from the crystallographic coordinates extracted from the crystal structure. The Stuttgart relativistic small core potential and the valence basis sets for Zn <sup>[S3]</sup> and the 6-31+G\*\* <sup>[S4]</sup> basis set for the other elements (C, N, O, H) were used in our DFT calculations. The same functional and RECP basis sets have been chosen for the Time-dependent density functional theory excited-state calculation. Solvent effects (DMF) were included during the optimization and TD-DFT calculations using the polarizable continuum model <sup>[S5]</sup> (PCM,  $\epsilon = 37.219$ ).

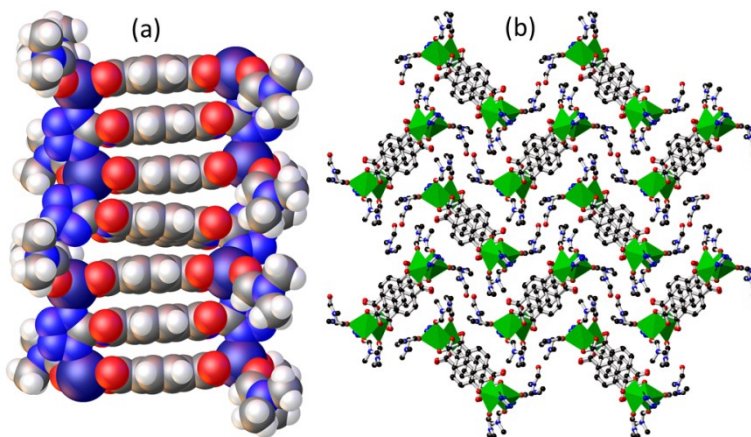

**Fig. S1** (a). Space filling structure of NBU-4; (b). Packing structure of NBU-4 showing the neighboring 1D stair-like chains perpendicular to each other.

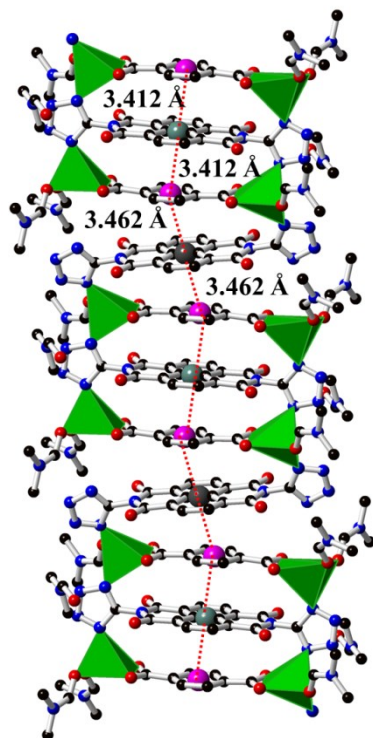

**Fig. S2.** Strong  $\pi$ - $\pi$  stacking interactions in NBU-4.

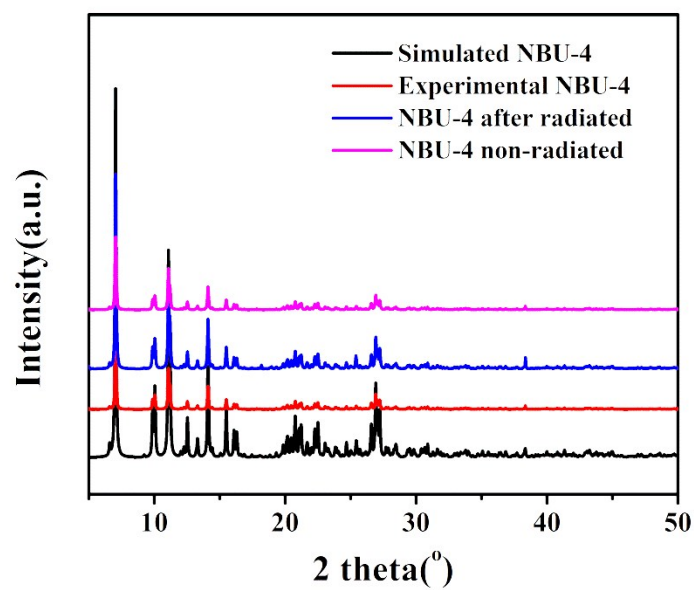

**Fig. S3.** PXRD patterns of NBU-4, its radiated and non-radiated samples (the radiated sample was treated in the dark for overnight.).

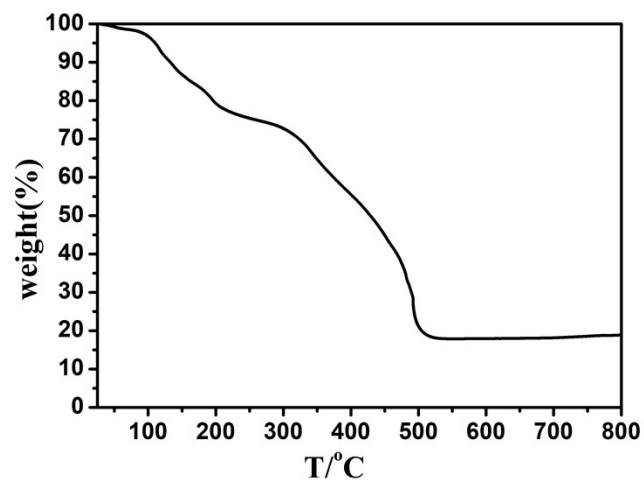

Fig. S4. TGA result of NBU-4.

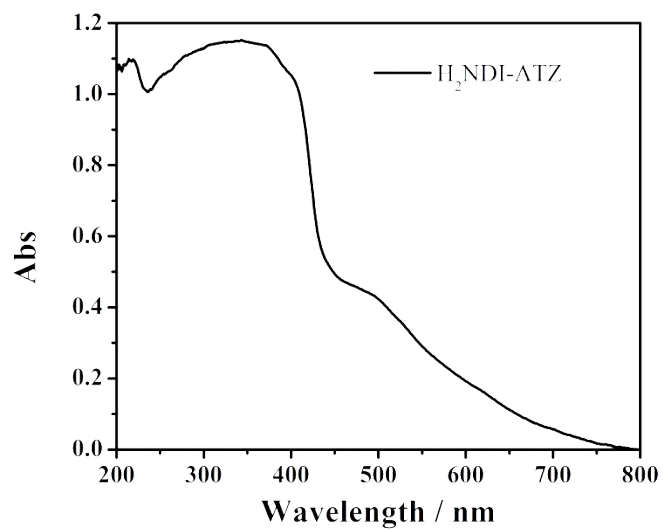

Fig. S5. The UV-Vis spectra of H<sub>2</sub>NDI-ATZ.

**Table S1.** Crystallographic data and refinement details for **NBU-4**

|                                                                | <b>NBU-4</b>                                        |
|----------------------------------------------------------------|-----------------------------------------------------|
| CCDC Number                                                    | 1846228                                             |
| Empirical formula                                              | $\{[Zn_4(NDI-ATZ)_2(BDC)_2(DMF)_6] \cdot (DMF)\}_n$ |
| Color & habit                                                  | Yellow, Rod                                         |
| Crystal size (mm <sup>3</sup> )                                | 0.26 x 0.21 x 0.17                                  |
| Temperature (K)                                                | 293K                                                |
| Crystal system                                                 | Monoclinic                                          |
| Space group                                                    | P2 <sub>1</sub> /c                                  |
| a(Å)                                                           | 13.506(5)                                           |
| b(Å)                                                           | 17.590(4)                                           |
| c(Å)                                                           | 18.041(6)                                           |
| α(°)                                                           | 90                                                  |
| β(°)                                                           | 97.01(2)                                            |
| γ(°)                                                           | 90                                                  |
| V(Å <sup>3</sup> ), Z                                          | 4254(2), 2                                          |
| D <sub>cal</sub> (Mg/m <sup>3</sup> )                          | 1.485                                               |
| Abs. coeff.(mm <sup>-1</sup> )                                 | 1.201                                               |
| F(000)                                                         | 1944.0                                              |
| 2θ range for data collection (°)                               | 4.64 to 50                                          |
| Reflections collected                                          | 21398                                               |
| Indep. Reflection, R(int)                                      | 7453, 0.1101                                        |
| Completeness of data                                           | 99.5 %                                              |
| Data/ restraints / parameters                                  | 7453/1/583                                          |
| Goodness-of-fit on F <sup>2</sup>                              | 1.023                                               |
| R1 [I>2σ(I)], wR2                                              | 0.0682, 0.1240                                      |
| R1 (all data), wR2                                             | 0.1743, 0.1460                                      |
| Largest diff. peak and hole (e <sup>-</sup> ·Å <sup>-3</sup> ) | 0.49, -0.40                                         |

**Table S2.** Selected bond lengths (Å) and bond angles (°) for **NBU-4**

|                                      |           |                         |           |
|--------------------------------------|-----------|-------------------------|-----------|
| Zn1 - O1                             | 2.272(5)  | Zn1-O2                  | 2.032(5)  |
| Zn1 - O5                             | 1.992(5)  | Zn1-O6                  | 1.965(5)  |
| Zn1 - N3                             | 2.000(5)  | Zn2-O3 <sup>1</sup>     | 2.450(5)  |
| Zn2 - O4 <sup>1</sup>                | 1.968(4)  | Zn2-O9                  | 1.999(5)  |
| Zn2 - N6                             | 2.021(5)  | Zn2-N9                  | 1.978(5)  |
| O2-Zn1-O1                            | 60.04(19) | N3-Zn1-O1               | 98.7(2)   |
| O5-Zn1-O1                            | 153.8(2)  | O6-Zn1-O1               | 89.0(2)   |
| N3-Zn1-O2                            | 108.5(2)  | O5-Zn1-O2               | 98.1(2)   |
| O6-Zn1-O2                            | 133.5(2)  | O5-Zn1-N3               | 102.3(2)  |
| O6-Zn1-O5                            | 98.3(2)   | O6-Zn1-N3               | 110.0(2)  |
| O4 <sup>1</sup> -Zn2-N9              | 116.3(2)  | O4 <sup>1</sup> -Zn2-O9 | 103.5(2)  |
| N9-Zn2-O9                            | 99.9(2)   | O9-Zn2-N6               | 95.1(2)   |
| O4 <sup>1</sup> -Zn2-N6              | 114.7(2)  | N9-Zn2-N6               | 121.0(2)  |
| O4 <sup>1</sup> -Zn2-O3 <sup>1</sup> | 57.87(17) | N9-Zn2-O3 <sup>1</sup>  | 93.28(19) |
| O9-Zn2-O3 <sup>1</sup>               | 160.9(2)  | N6-Zn2-O3 <sup>1</sup>  | 89.79(19) |

<sup>1</sup>x,1-y,-z.**Table S3.** The excited states, transition wavelengths ( $\lambda$ ), oscillator strengths ( $f$ ) and MO transitions with absolute contribution <sup>33</sup> of TD-DFT calculations of **NBU-4** fragment.

| Excited States | $\lambda$ (nm) | $f$ (oscillator strength) | Frontier molecular orbitals           | Percent (%) |
|----------------|----------------|---------------------------|---------------------------------------|-------------|
| 1              | 418.0          | 0.0001                    | 222 (HOMO-1) $\rightarrow$ 224 (LUMO) | 55.2        |
|                |                |                           | 223 (HOMO) $\rightarrow$ 224 (LUMO)   | 29.4        |
|                |                |                           | 221 (HOMO-2) $\rightarrow$ 224 (LUMO) | 13.2        |
| 2              | 415.9          | 0.0035                    | 223 (HOMO) $\rightarrow$ 224 (LUMO)   | 49.4        |
|                |                |                           | 221 (HOMO-2) $\rightarrow$ 224 (LUMO) | 42.6        |
| 3              | 396.2          | 0.0052                    | 220 (HOMO-3) $\rightarrow$ 224 (LUMO) | 89.4        |
| 4              | 388.1          | 0.3963                    | 221 (HOMO-2) $\rightarrow$ 224 (LUMO) | 39.0        |
|                |                |                           | 222 (HOMO-1) $\rightarrow$ 224 (LUMO) | 34.4        |
|                |                |                           | 223 (HOMO) $\rightarrow$ 224 (LUMO)   | 19.8        |

## References

[S1] (a) A. D. Becke, A new mixing of Hartree–Fock and local density-functional theories, *J. Chem. Phys.*, 1993, **98**, 1372–1377; (b) C. Lee, W. Yang, R. G. Parr, Development of the Colle-Salvetti correlation-energy formula into a functional of the electron density, *Phys. Rev. B.*, 1988, **37**, 785–789.

[S2] M. J. Frisch, G. W. Trucks, H. B. Schlegel, G. E. Scuseria, M. A. Robb, J. R. Cheeseman, G. Scalmani, V. Barone, B. Mennucci, G. A. Petersson, H. Nakatsuji, M. Caricato, X. Li, H. P. Hratchian, A. F. Izmaylov, J. Bloino, G. Zheng, J. L. Sonnenberg, M. Hada, M. Ehara, K. Toyota, R. Fukuda, J. Hasegawa, M. Ishida, T. Nakajima, Y. Honda, O. Kitao, H. Nakai, T. Vreven, J. A. Montgomery Jr., J. E. Peralta, F. Ogliaro, M. Bearpark, J. J. Heyd, E. Brothers, K.

N. Kudin, V. N. Staroverov, T. Keith, R. Kobayashi, J. Normand, K. Raghavachari, A. Rendell, J. C. Burant, S. S. Iyengar, J. Tomasi, M. Cossi, N. Rega, J. M. Millam, M. Klene, J. E. Knox, J. B. Cross, V. Bakken, C. Adamo, J. Jaramillo, R. Gomperts, R. E. Stratmann, O. Yazyev, A. J. Austin, R. Cammi, C. Pomelli, J. W. Ochterski, R. L. Martin, K. Morokuma, V. G. Zakrzewski, G. A. Voth, P. Salvador, J. J. Dannenberg, S. Dapprich, A. D. Daniels, O. Farkas, J. B. Foresman, J. V. Ortiz, J. Cioslowski and D. J. Fox, *Gaussian 09, Revision C.01*, Gaussian, Inc., Wallingford CT, 2010.

[S3] (a) U. Haeusermann, M. Dolg, H. Stoll, H. Preuss, Accuracy of energy-adjusted quasirelativistic ab initio pseudopotentials, *Mol. Phys.*, 1993, **78**, 1211–1224. (b) W. Kuechle, M. Dolg, H. Stoll, H. Preuss, Energy-adjusted pseudopotentials for the actinides. Parameter sets and test calculations for thorium and thorium monoxide, *J. Chem. Phys.*, 1994, **100**, 7535–7542. (c) T. Leininger, A. Nicklass, H. Stoll, M. Dolg, P. Schwerdtfeger, The accuracy of the pseudopotential approximation. II. A comparison of various core sizes for indium pseudopotentials in calculations for spectroscopic constants of InH, InF, and InCl, *J. Chem. Phys.*, 1996, **105**, 1052–1059.

[S4] (a) R. Ditchfield, W. J. Hehre, J. A. Pople, Self-Consistent Molecular-Orbital Methods. IX. An Extended Gaussian-Type Basis for Molecular-Orbital Studies of Organic Molecules, *J. Chem. Phys.* 1971, **54**, 724; (b) W. J. Hehre, R. Ditchfield, J. A. Pople, Self—Consistent Molecular Orbital Methods. XII. Further Extensions of Gaussian—Type Basis Sets for Use in Molecular Orbital Studies of Organic Molecules, *J. Chem. Phys.* 1972, **56**, 2257; (c) P. C. Hariharan, J. A. Pople, Accuracy of AH<sub>n</sub> equilibrium geometries by single determinant molecular orbital theory, *Mol. Phys.* 1974, **27**, 209; (d) M. S Gordon, The isomers of silacyclopropane, *Chem. Phys. Lett.*, 1980, **76**, 163.

[S5] (a) V. Barone, M. Cossi, Quantum Calculation of Molecular Energies and Energy Gradients in Solution by a Conductor Solvent Model, *J. Phys. Chem. A.*, 1998, **102**, 1995–2001. (b) J. Tomasi, M. Persico, Molecular Interactions in Solution: An Overview of Methods Based on Continuous Distributions of the Solvent, *Chem. Rev.*, 1994, **94**, 2027–2094.
